# Supplementary material for: Effectiveness of a 6-Month Lifestyle Intervention on Diet, Physical Activity, Quality of Life, and Markers of Cardiometabolic Health in Women with PCOS and Obesity and Non-PCOS Obese Controls: One Size Fits All?
Source: MDPI journal article supplement (doi:10.3390/nu13103425), 2021-09-28
Supplement: s1 [file s1]

**Table S1.** Dietary intake, physical activity, and QoL at baseline, three months, and six months.

|                                             | PCOS                 |                             |             |                           |             | Non-PCOS              |                              |             |                           |             |
|---------------------------------------------|----------------------|-----------------------------|-------------|---------------------------|-------------|-----------------------|------------------------------|-------------|---------------------------|-------------|
|                                             | Baseline<br>(N = 84) | Three<br>months (N<br>= 50) | p-<br>value | Six<br>months<br>(N = 33) | p-<br>value | Baseline<br>(N = 166) | Three<br>months (N =<br>101) | p-<br>value | Six<br>months<br>(N = 56) | p-<br>value |
| Energy intake (kcal/day)                    | 1874<br>(70.0)       | 1378 (47.0)                 | <0.001      | 1415<br>(46.6)            | <0.001      | 1883<br>(40.1)        | 1451 (34.1)                  | <0.001      | 1474<br>(51.0)            | <0.001      |
| Vegetable intake (g/day)                    | 124 (6.0)            | 149 (11.4)                  | 0.03        | 147 (10.6)                | 0.01        | 133 (5.6)             | 143 (7.0)                    | 0.09        | 133 (7.5)                 | 0.98        |
| Fruit intake (g/day)                        | 118 (8.8)            | 130 (11.4)                  | 0.33        | 123 (11.6)                | 0.66        | 111 (6.7)             | 129 (7.2)                    | 0.003       | 115 (8.4)                 | 0.60        |
| Sugary drinks<br>(glasses/day)              | 2.6 (0.4)            | 1.2 (0.2)                   | <0.001      | 1.1 (0.3)                 | 0.001       | 1.5 (0.2)             | 0.7 (0.1)                    | <0.001      | 0.9 (0.2)                 | 0.01        |
| Alcoholic beverages<br>(glasses/day)        | 0.1 (0.03)           | 0.04 (0.01)                 | 0.04        | 0.04<br>(0.03)            | 0.09        | 0.2 (0.04)            | 0.1 (0.02)                   | 0.002       | 0.1 (0.03)                | 0.01        |
| Savory snacks<br>(handful/week)             | 7.5 (1.4)            | 2.7 (0.5)                   | 0.001       | 2.5 (0.5)                 | <0.001      | 6.4 (0.6)             | 2.1 (0.3)                    | <0.001      | 3.1 (0.4)                 | <0.001      |
| Sweet snacks<br>(portion/week) <sup>a</sup> | 5.9 (1.0)            | 2.5 (0.5)                   | 0.001       | 3.4 (0.9)                 | 0.05        | 6.2 (0.7)             | 2.4 (0.4)                    | <0.001      | 2.2 (0.4)                 | <0.001      |
| Steps (steps/day)                           | 5962<br>(393.6)      | 8790 (658.7)                | <0.001      | 9264<br>(468.5)           | <0.001      | 6086<br>(286.8)       | 9160 (372.0)                 | <0.001      | 9208<br>(569.2)           | <0.001      |
| Total MVPA (min/week)                       | 567<br>(73.8)        | 1059 (151.8)                | 0.001       | 532<br>(105.3)            | 0.77        | 648<br>(58.7)         | 772 (99.1)                   | 0.24        | 820 (107)                 | 0.09        |
| Leisure time MVPA<br>(min/week)             | 275<br>(46.8)        | 541 (107)                   | 0.01        | 217 (40.9)                | 0.34        | 344<br>(45.7)         | 415 (81.0)                   | 0.44        | 394 (69.2)                | 0.45        |
| Commuting MVPA<br>(min/week)                | 53.6<br>(11.3)       | 59.4 (17.3)                 | 0.72        | 61.3<br>(20.7)            | 0.71        | 59.3<br>(11.7)        | 70.8 (17.6)                  | 0.45        | 70.0<br>(15.4)            | 0.41        |
| Physical Component<br>Score                 | 49.0 (1.1)           | 50.3 (1.3)                  | 0.13        | 51.0 (1.4)                | 0.09        | 49.5 (0.8)            | 52.7 (0.8)                   | <0.001      | 52.7 (1.0)                | 0.003       |
| Mental Component<br>Score                   | 49.9 (0.9)           | 48.9 (1.4)                  | 0.43        | 50.0 (1.4)                | 0.95        | 50.5 (0.8)            | 49.6 (1.0)                   | 0.44        | 49.3 (1.4)                | 0.40        |

MVPA: moderate to vigorous physical activity. Data are presented as estimated marginal means (SE) from generalized estimating equations analyses. p-values indicates the difference between three months and baseline or between six months and baseline in PCOS with PCOS and non-PCOS women, respectively. <sup>a</sup>One portion of sweet snacks included 2 biscuits, or 2 pieces of chocolate, or 5 candies, or 5 pieces of liquorice.

**Table S2.** Cardiometabolic outcomes at baseline, three and six months.

|                                 | PCOS              |                       |         |                     |         | Non-PCOS           |                        |         |                     |         |
|---------------------------------|-------------------|-----------------------|---------|---------------------|---------|--------------------|------------------------|---------|---------------------|---------|
|                                 | Baseline (N = 84) | Three months (N = 50) | P-value | Six months (N = 33) | p-value | Baseline (N = 166) | Three months (N = 101) | p-value | Six months (N = 56) | P-value |
| Weight (kg)                     | 104 (1.4)         | 100 (1.6)             | <0.001  | 100 (1.6)           | <0.001  | 104 (1.0)          | 100 (1.1)              | <0.001  | 98.7 (1.3)          | <0.001  |
| BMI                             | 35.9 (0.4)        | 34.4 (0.4)            | <0.001  | 34.5 (0.5)          | <0.001  | 36.1 (0.3)         | 34.9 (0.3)             | <0.001  | 34.4 (0.4)          | <0.001  |
| Waist circumference (cm)        | 108 (1.0)         | 104 (1.3)             | <0.001  | 103.5 (1.2)         | <0.001  | 108 (0.7)          | 105 (0.9)              | <0.001  | 104 (1.0)           | <0.001  |
| Hip circumference (cm)          | 124 (0.9)         | 122 (1.2)             | 0.02    | 120 (1.2)           | <0.001  | 126 (0.7)          | 122 (0.8)              | <0.001  | 120 (1.0)           | <0.001  |
| Waist-hip circumference ratio   | 0.88 (0.009)      | 0.86 (0.01)           | 0.04    | 0.86 (0.01)         | 0.22    | 0.86 (0.004)       | 0.86 (0.006)           | 0.78    | 0.86 (0.007)        | 0.78    |
| Systolic blood pressure (mmHg)  | 125 (1.7)         | 125 (2.6)             | 0.997   | 114 (2.4)           | <0.001  | 127 (0.9)          | 128 (1.5)              | 0.38    | 125 (2.4)           | 0.44    |
| Diastolic blood pressure (mmHg) | 78.4 (1.0)        | 80.0 (1.4)            | 0.31    | 76.1 (1.4)          | 0.099   | 80.6 (0.6)         | 80.9 (1.2)             | 0.77    | 83.2 (1.8)          | 0.15    |
| Triglycerides (mmol/L)          | 1.2 (0.1)         | 1.3 (0.1)             | 0.53    | 1.0 (0.1)           | 0.02    | 1.3 (0.1)          | 1.3 (0.1)              | 0.87    | 1.2 (0.1)           | 0.18    |
| Total cholesterol (mmol/L)      | 4.7 (0.1)         | 4.6 (0.1)             | 0.38    | 4.5 (0.1)           | 0.10    | 4.8 (0.1)          | 4.7 (0.1)              | 0.05    | 4.8 (0.1)           | 0.76    |
| HDL-C (mmol/L)                  | 1.1 (0.03)        | 1.1 (0.03)            | 0.99    | 1.2 (0.04)          | 0.12    | 1.2 (0.02)         | 1.2 (0.03)             | 0.56    | 1.2 (0.04)          | 0.007   |
| LDL-C (mmol/L)                  | 3.1 (0.1)         | 2.9 (0.1)             | 0.04    | 2.9 (0.1)           | 0.02    | 3.2 (0.1)          | 3.0 (0.1)              | 0.02    | 3.1 (0.1)           | 0.74    |
| hs-CRP (mg/L)                   | 5.6 (0.5)         | 5.3 (0.7)             | 0.57    | 4.9 (0.7)           | 0.19    | 5.4 (0.4)          | 5.2 (0.4)              | 0.71    | 6.7 (1.2)           | 0.25    |
| Glucose (mmol/L)                | 5.3 (0.1)         | 5.3 (0.1)             | 0.63    | 5.4 (0.1)           | 0.36    | 5.3 (0.04)         | 5.3 (0.1)              | 0.39    | 5.2 (0.1)           | 0.22    |
| Insulin (pmol/L)                | 115 (7.4)         | 92.3 (7.5)            | 0.004   | 116 (9.8)           | 0.97    | 90.2 (3.6)         | 83.3 (4.1)             | 0.04    | 78.3 (4.7)          | 0.005   |
| HOMA-IR                         | 4.0 (0.3)         | 3.2 (0.3)             | 0.02    | 4.1 (0.4)           | 0.81    | 3.1 (0.1)          | 2.8 (0.2)              | 0.06    | 2.7 (0.2)           | 0.01    |
| Metabolic syndrome (yes)*       | 40/65 (61.5%)     | 12/32 (37.5%)         | 0.03    | 5/16 (31.3%)        | 0.04    | 70/142 (49.3%)     | 31/65 (47.7%)          | 0.55    | 15/34 (44.1%)       | 0.40    |

HDL-C: high-density lipoprotein cholesterol; LDL-C: low-density lipoprotein cholesterol; hs-CRP: high-sensitivity C-reactive protein; HOMA-IR: homeostasis model assessment of insulin resistance. Data are presented as estimated marginal means (SE) from generalized estimating equations analyses. \* Presented as number (percentage). p-values indicates the difference between three months and baseline or between six months and baseline in women with PCOS and non-PCOS women, respectively.
